# Supplementary material for: Self-powered, online, highly sensitive lubricating oil acidity monitoring driven by a triboelectric sensor
Source: Royal Society of Chemistry journal article supplement (doi:10.1039/d5ta00241a), 2025-01-01
Supplement: d5ta00241a1.pdf [file d5ta00241a1.pdf]

## Supplementary Information

### **Self-powered, on-line, highly-sensitive lubricating oil acidity monitoring driven by triboelectric sensor**

Bin Ge<sup>a,1</sup>, Dong Liang<sup>a,1</sup>, Yi Lei<sup>a</sup>, Yajie Zhang<sup>b,\*</sup>, Yi Liu<sup>a</sup>, Wei Wu<sup>a</sup>, Yijun Shi<sup>c,\*</sup>, Jun Zhao<sup>a,\*</sup>,

<sup>a</sup> School of Mechanical Engineering, Beijing Institute of Technology, Beijing 100081, PR China

<sup>b</sup> Key Laboratory for the Physics and Chemistry of Nanodevices, School of Electronics, Peking University, Beijing 100871, China

<sup>c</sup> Division of Machine Elements, Luleå University of Technology, Luleå SE-971 87, Sweden

\*Emails: yjzhang11@pku.edu.cn; yijun.shi@ltu.se; zhaojun@bit.edu.cn

<sup>1</sup>These authors contributed equally

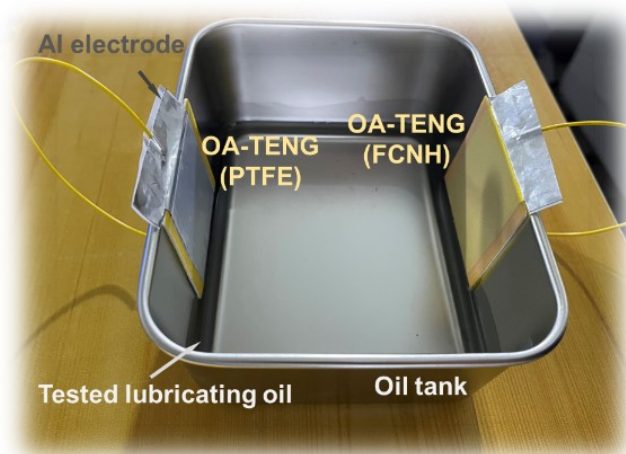

**Fig. S1** The optical picture of the triboelectric rig in this study.

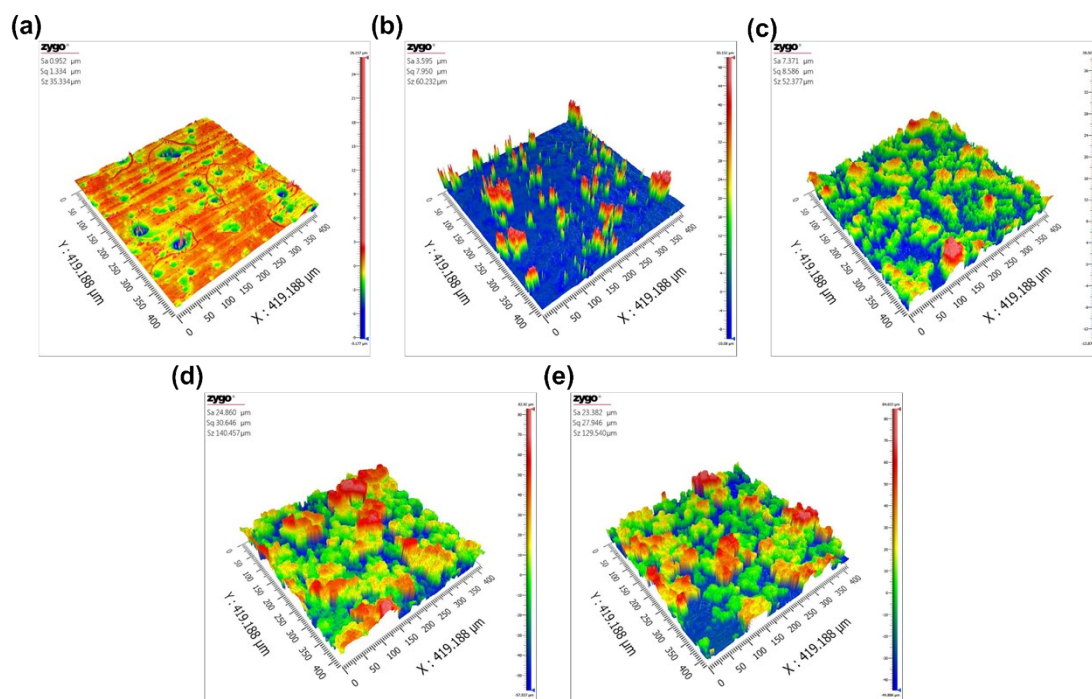

**Fig. S2** Three-dimensional morphologies of the OA-TENG surfaces with different mass of  $\text{SiO}_2$  in spraying solution. 0.1 g (a), 0.2 g (b), 0.3 g (c), 0.4 g (d), 0.5 g (e).

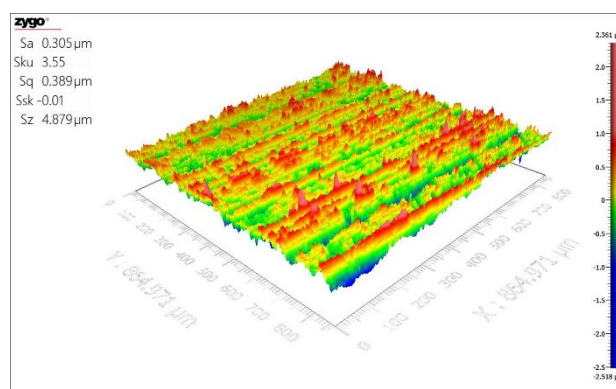

**Fig. S3** Three-dimensional morphologies of commercial-received PTFE for comparison.

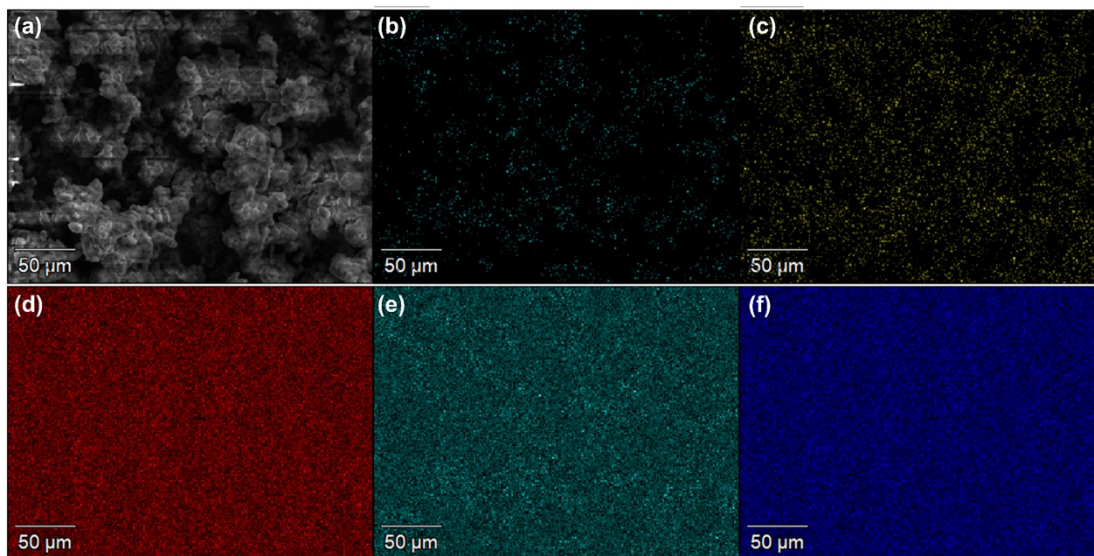

**Fig. S4** The morphology and element distribution of the OA-TENG surfaces (FCNH-3). SEM morphology (a), F (b), Si (c), C (d), O (e), and N (f) element distribution.

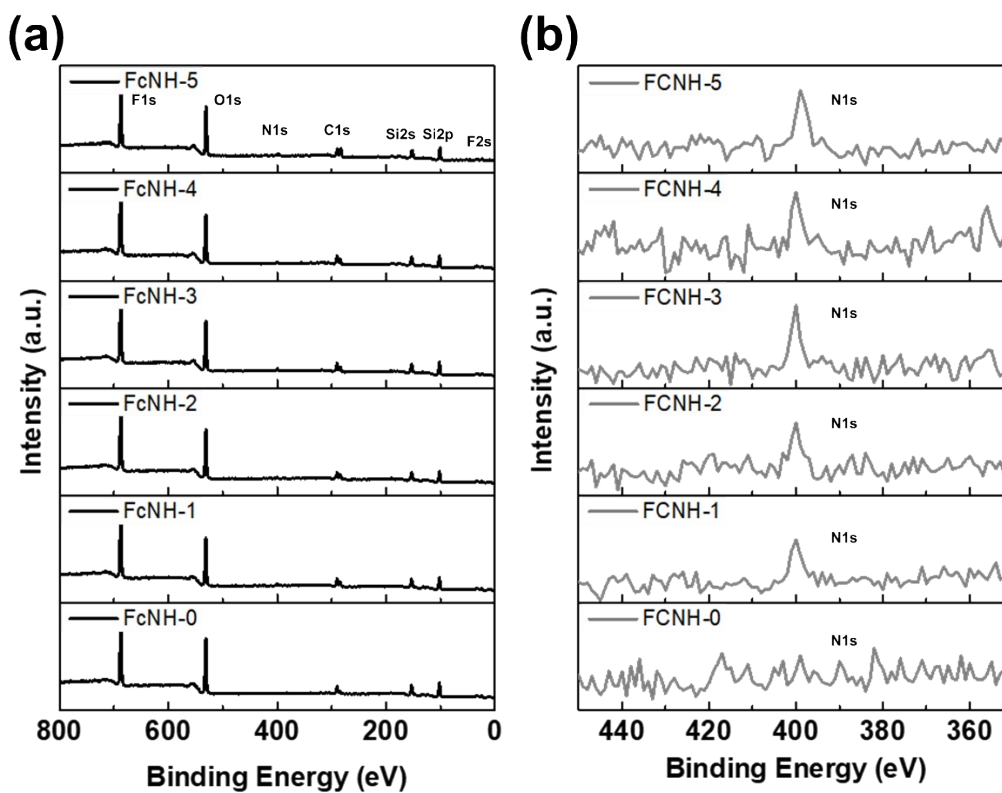

**Figure S5** XPS survey spectra of the OA-TENG.

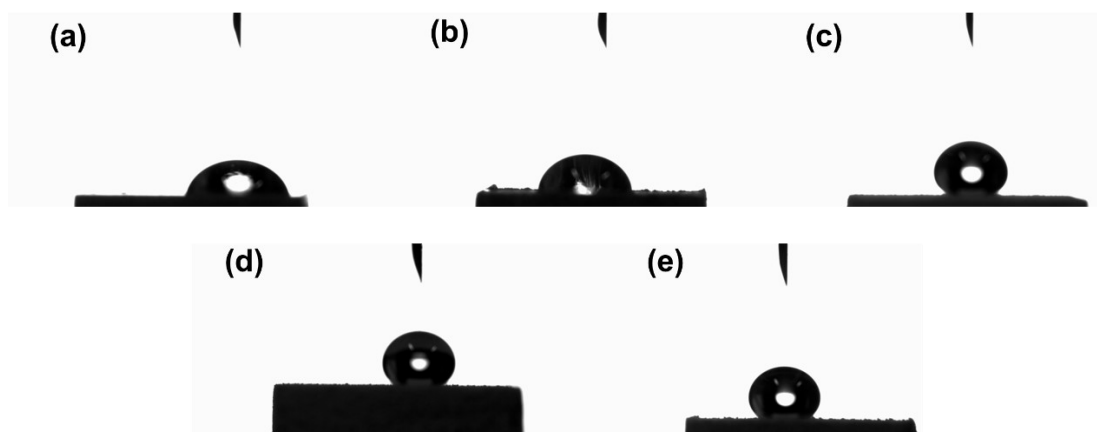

**Fig. S6** The images of oil contact angle on the OA-TENG (FCNH) (FC: 6 g, APTES: 90 mg) with different mass of SiO<sub>2</sub>: 0.1 g (a), 0.2 g (b), 0.3 g (c), 0.4 g (d), 0.5 g (e).

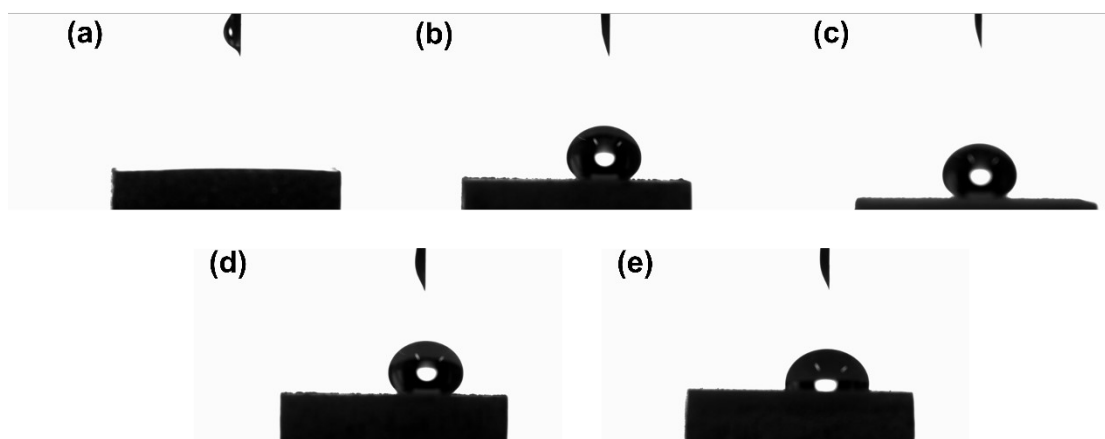

**Fig. S7** The images of oil contact angle on the OA-TENG (FCNH) (SiO<sub>2</sub>: 0.3g, APTES: 90 mg) with different mass of FC: 0 g (a), 2 g (b), 4 g (c), 6 g (d), 8 g (e).

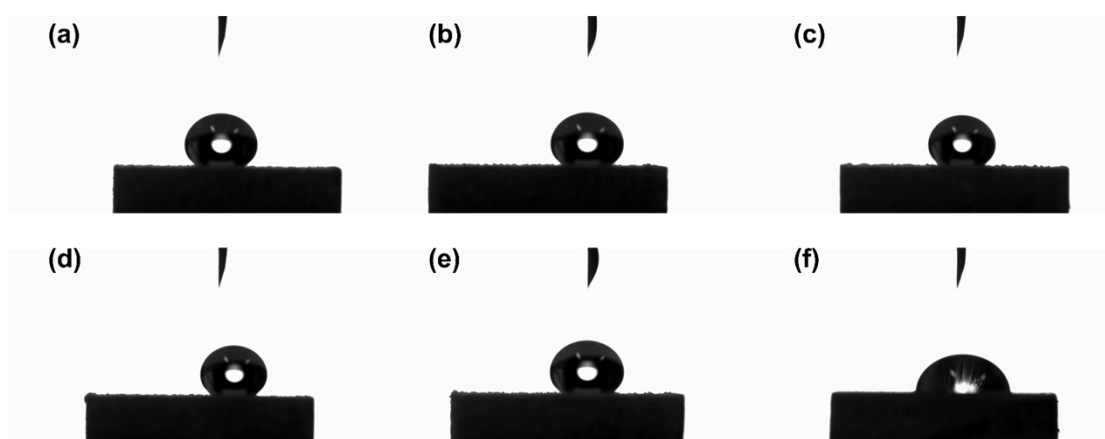

**Fig. S8** The images of oil contact angle on the OA-TENG (FCNH) (SiO<sub>2</sub>: 0.3g, FC: 6 g) spraying with different mass of APTES: 0 g (a), 30 mg (b), 60 mg (c), 90 mg (d), 120 mg (e), 150 mg (f).

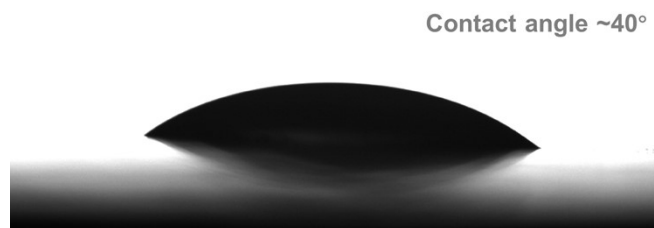

**Fig. S9** The image of oil contact angle on commercial pure PTFE.

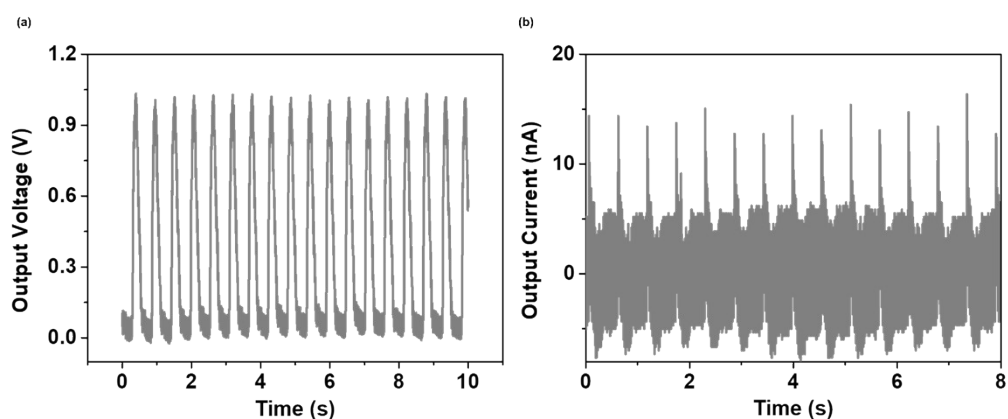

**Fig. S10** The voltage (a) and current (b) output of PTFE-based OA-TENG.

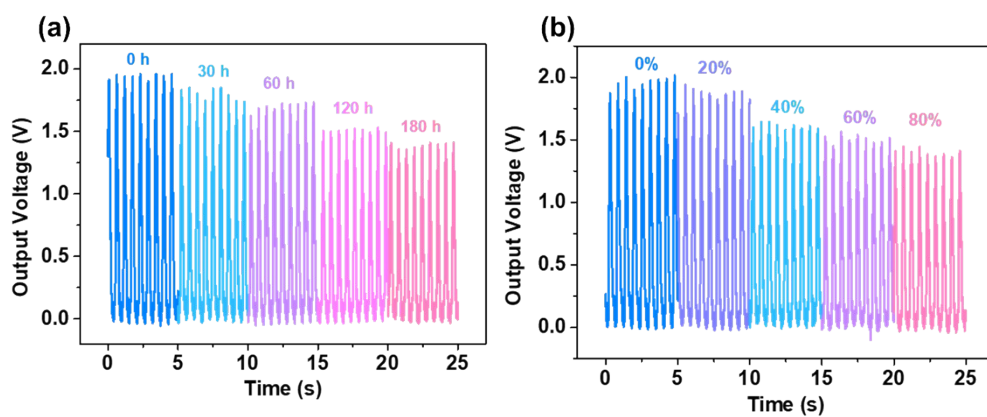

**Fig. S11** The influence of the aged oil with different aging time on the voltage of the OA-TENG (FCNH-0) (a). The voltage of the OA-TENG (FCNH-0) contacting the paraffin oil laden with different volume concentration of aged oils (180 h).

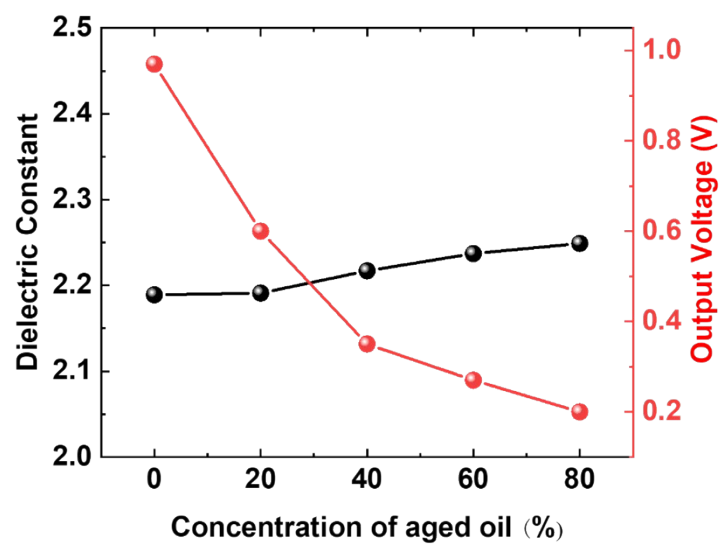

**Fig. S12** The relationship between dielectric properties and output voltage of OA-TENG.

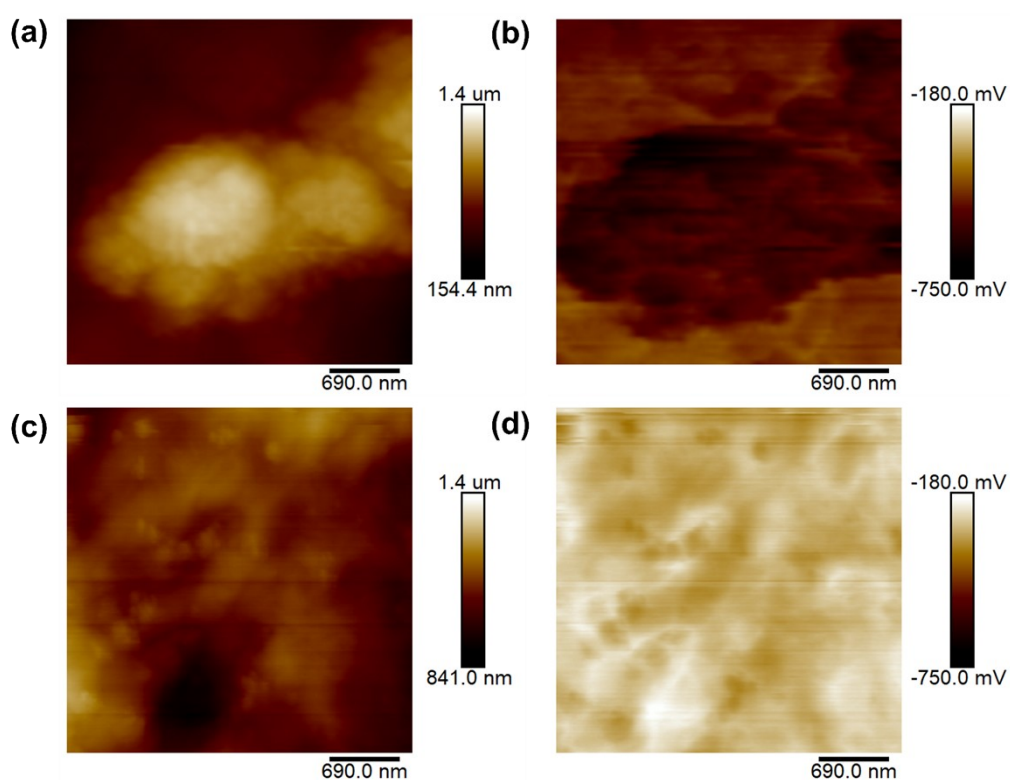

**Fig. S13** KPFM results of FCNH-0 (a) topography and (b) surface potential mapping, and FCNH-3(a) topography and (b) surface potential mapping.

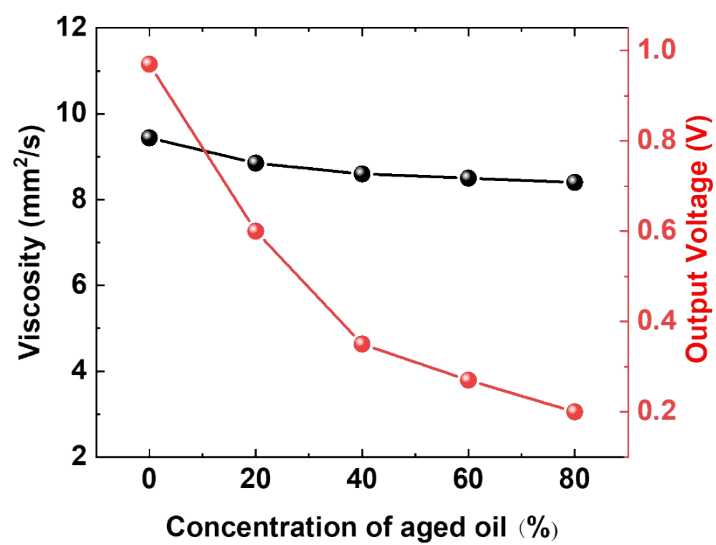

**Fig. S14** The relationship between viscosity and TENG output.

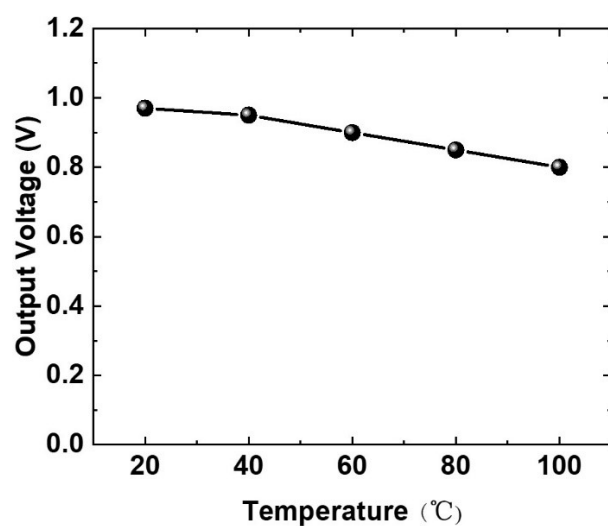

**Fig. S15** Output voltage of the OA-TENG contacting with paraffin oil as a function of oil temperature.

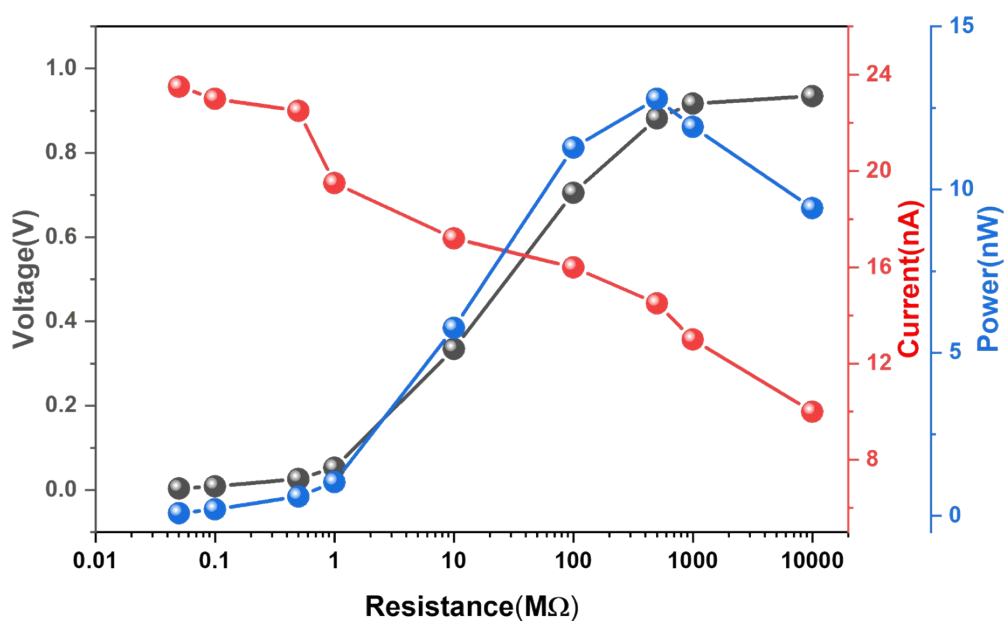

**Fig. S16** The peak current, voltage and power of the OA-TENG (FCNH-3) with various load resistances.

**Table S1** Fabrication of OA-TENG samples with different SiO<sub>2</sub>

| Samples | Fluorocarbon surfactant (FC) | Spraying mass of APTES | SiO <sub>2</sub> |
|---------|------------------------------|------------------------|------------------|
| 1       | 6 g                          | 90 mg                  | 0 g              |
| 2       |                              |                        | 0.1 g            |
| 3       |                              |                        | 0.2 g            |
| 4       |                              |                        | 0.3 g            |
| 5       |                              |                        | 0.4 g            |
| 6       |                              |                        | 0.5 g            |

**Table S2** Fabrication of OA-TENG samples with different FC

| Samples | Fluorocarbon surfactant (FC) | Spraying mass of APTES | SiO <sub>2</sub> |
|---------|------------------------------|------------------------|------------------|
| 1       | 0 g                          | 90 mg                  | 0.3 g            |
| 2       | 2 g                          |                        |                  |
| 3       | 4 g                          |                        |                  |
| 4       | 6 g                          |                        |                  |
| 5       | 8 g                          |                        |                  |

**Table S3** The OA-TENG samples with different spraying masses of APTES

| Sample name | Fluorocarbon surfactant (FC) | Spraying mass of APTES (~ with a -NH <sub>2</sub> group) | SiO <sub>2</sub> |
|-------------|------------------------------|----------------------------------------------------------|------------------|
| FCNH-0      | 6 g                          | 0 g                                                      | 0.3 g            |
| FCNH-1      |                              | 30 mg                                                    |                  |
| FCNH-2      |                              | 60 mg                                                    |                  |
| FCNH-3      |                              | 90 mg                                                    |                  |
| FCNH-4      |                              | 120 mg                                                   |                  |
| FCNH-5      |                              | 150 mg                                                   |                  |

**Table S4** The atomic concentration (at.%) of the OA-TENG from the XPS spectra measurement

| Samples | C1s   | N1s  | O1s   | F1s   | Si2p  |
|---------|-------|------|-------|-------|-------|
| FCNH-0  | 17.12 | 0.28 | 38.24 | 28.64 | 15.72 |
| FCNH-1  | 21.95 | 1.29 | 33.33 | 29.45 | 13.98 |
| FCNH-2  | 21.56 | 1.50 | 33.61 | 29.12 | 14.21 |
| FCNH-3  | 21.70 | 1.49 | 33.16 | 29.72 | 13.93 |
| FCNH-4  | 22.64 | 1.56 | 32.95 | 28.88 | 13.98 |
| FCNH-5  | 24.59 | 2.65 | 32.40 | 26.38 | 13.98 |
